# Supplementary material for: Polydopamine-coated graphene nanosheets as efficient electrocatalysts for oxygen reduction reaction
Source: Royal Society of Chemistry journal article supplement (doi:10.1039/c8ra01027g), 2018-01-01
Supplement: c8ra01027g1.pdf [file c8ra01027g1.pdf]

## Supplementary Information

### Polydopamine-coated Graphene Nanosheets as Efficient

### Electrocatalysts for Oxygen Reduction Reaction

Dan-Dan Wang,<sup>a</sup> Xiuli Gao,<sup>b</sup> Lianming Zhao,<sup>a</sup> Jin Zhou,<sup>a</sup> Shuping Zhuo,<sup>a</sup>  
Zifeng Yan<sup>b</sup> and Wei Xing<sup>\*b</sup>

*<sup>a</sup>School of Chemical Engineering, Shandong University of Technology,  
Zibo 255049, P. R. China*

*<sup>b</sup>School of Science, State Key Laboratory of Heavy Oil Processing, China  
University of Petroleum, Qingdao 266580, P. R. China*

\* E-mails: xingwei@upc.edu.cn

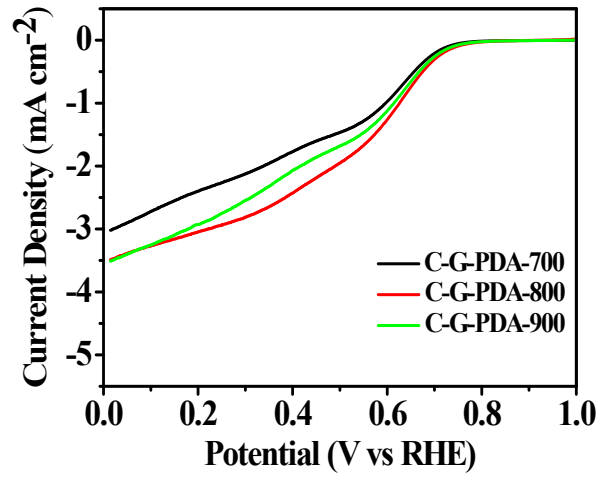

Fig.S1. LSV curves at 1600rpm for C-G-PDA-t samples.

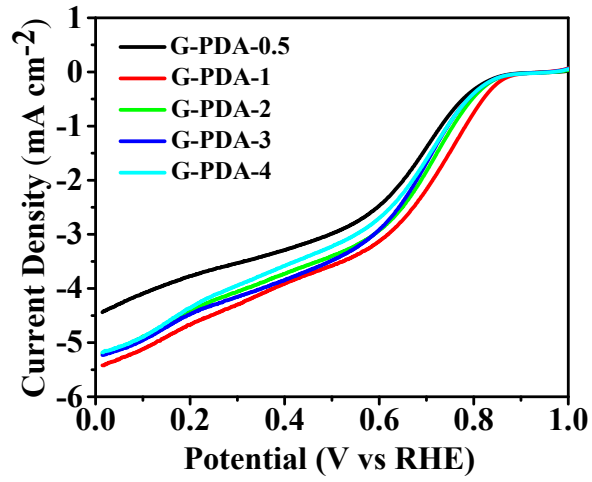

Fig.S2. LSV curves at 1600rpm for the G-PDA-m samples.
